# Supplementary material for: Genomic analysis of worldwide sheep breeds reveals PDGFD as a major target of fat-tail selection in sheep
Source: PubMed Central journal article supplement (PMC7670677; doi:10.1186/s12864-020-07210-9), 2020-11-17

Figure S5

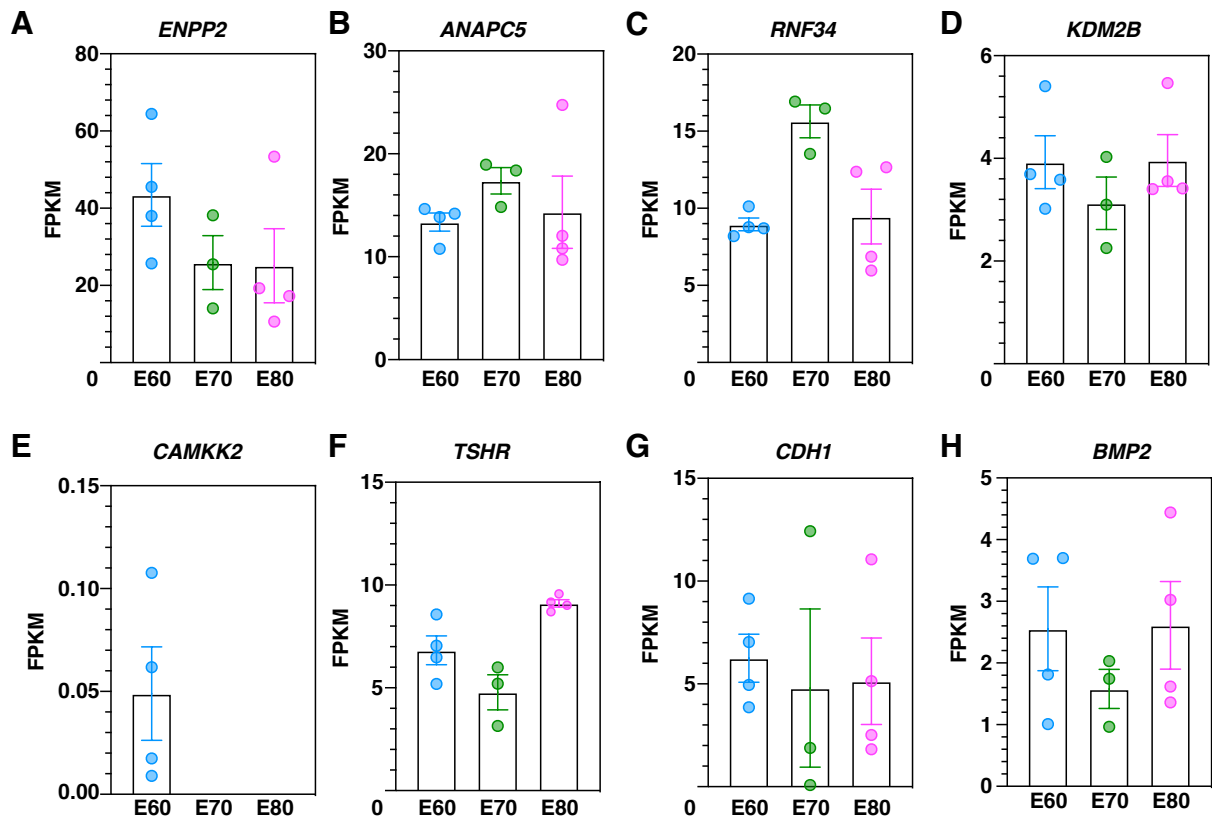

Supplement: 12864_2020_7210_MOESM11_ESM.pdf [file 12864_2020_7210_MOESM11_ESM.pdf]
