# Supplementary material for: Genomic analysis of worldwide sheep breeds reveals PDGFD as a major target of fat-tail selection in sheep
Source: BMC Genomics. 2020 Nov 17;21:800. doi: 10.1186/s12864-020-07210-9 (PMC7670677; doi:10.1186/s12864-020-07210-9)
Supplement: Supplementary file 10 — Additional file 10 Figure S4. Replication of the top candidate SNPs proposed by three previous studies in all sheep breeds used in this study. (A) Derived allele frequency (DAF) of the top candidate SNPs previously proposed. (B) The top panel of “A” indicates the the derived allele frequency (DAF) of 10 top SNPs on chromosome 5 and 7 proposed in Table 3 in study of Moradi et al.. The s553221.1 locus on chromosome 5 in their study was not included because it did not pass the quality control in this study. (B) The middle panel of “A” shows the DAF of four SNPs corresponding to BMP2 and two SNPs corresponding to VRTN gene proposed in Table 2 in study of Moioli et al.. The s73063.1 locus annotated to VRTN was not was not included because it did not pass the quality control in this study. (C) The bottom panel of “A” represents the DAF of SNPs annotated to the key genes proposed in Table 1 and Table 2 in study of Yuan et al. The OAR4_73050615.1 locus is from Table 1 and other loci are from Table 2 in their study. [file 12864_2020_7210_MOESM10_ESM.pdf]

| Region | Chr | Position (Mb) | Peak SNP (F <sub>ST</sub> ) | Top SNP | Peak gene | Genes                                                                                                                                                                                                                                                                                                                                                                                                                                                                                                                                                                                                                                                                                                                                                                                                                                                                                                                                                                                                                                                                                                                                                                                                                                                                                                                                                                                                                                                                                                                                                                                                                                                                                                                                                                                                                                                                                                                                                                                                                                                                                                                                                                                                                                                                                                                                                                                                                                                                                                                                                                                                                                                                                                                                                                                                                                                                                                                                                                                                                                                                                                                                                                                                                                                                                                                                                                                                                                                                                                                                                                                                                                                                                                                     |
|--------|-----|---------------|-----------------------------|---------|-----------|---------------------------------------------------------------------------------------------------------------------------------------------------------------------------------------------------------------------------------------------------------------------------------------------------------------------------------------------------------------------------------------------------------------------------------------------------------------------------------------------------------------------------------------------------------------------------------------------------------------------------------------------------------------------------------------------------------------------------------------------------------------------------------------------------------------------------------------------------------------------------------------------------------------------------------------------------------------------------------------------------------------------------------------------------------------------------------------------------------------------------------------------------------------------------------------------------------------------------------------------------------------------------------------------------------------------------------------------------------------------------------------------------------------------------------------------------------------------------------------------------------------------------------------------------------------------------------------------------------------------------------------------------------------------------------------------------------------------------------------------------------------------------------------------------------------------------------------------------------------------------------------------------------------------------------------------------------------------------------------------------------------------------------------------------------------------------------------------------------------------------------------------------------------------------------------------------------------------------------------------------------------------------------------------------------------------------------------------------------------------------------------------------------------------------------------------------------------------------------------------------------------------------------------------------------------------------------------------------------------------------------------------------------------------------------------------------------------------------------------------------------------------------------------------------------------------------------------------------------------------------------------------------------------------------------------------------------------------------------------------------------------------------------------------------------------------------------------------------------------------------------------------------------------------------------------------------------------------------------------------------------------------------------------------------------------------------------------------------------------------------------------------------------------------------------------------------------------------------------------------------------------------------------------------------------------------------------------------------------------------------------------------------------------------------------------------------------------------------|
| 1      | 1   | 14.69-14.93   | QAR1_1661442.6 (0.35)       | 1       | SMAP2     | COL4A2, SMAP2, ZNF642, DEM1, ZNF688, GTF3F2, RIMS3                                                                                                                                                                                                                                                                                                                                                                                                                                                                                                                                                                                                                                                                                                                                                                                                                                                                                                                                                                                                                                                                                                                                                                                                                                                                                                                                                                                                                                                                                                                                                                                                                                                                                                                                                                                                                                                                                                                                                                                                                                                                                                                                                                                                                                                                                                                                                                                                                                                                                                                                                                                                                                                                                                                                                                                                                                                                                                                                                                                                                                                                                                                                                                                                                                                                                                                                                                                                                                                                                                                                                                                                                                                                        |
| 2      | 1   | 94.84-95.27   | QAR1_100921670.1 (0.46)     | 2       | –         | –                                                                                                                                                                                                                                                                                                                                                                                                                                                                                                                                                                                                                                                                                                                                                                                                                                                                                                                                                                                                                                                                                                                                                                                                                                                                                                                                                                                                                                                                                                                                                                                                                                                                                                                                                                                                                                                                                                                                                                                                                                                                                                                                                                                                                                                                                                                                                                                                                                                                                                                                                                                                                                                                                                                                                                                                                                                                                                                                                                                                                                                                                                                                                                                                                                                                                                                                                                                                                                                                                                                                                                                                                                                                                                                         |
| 3      | 1   | 215.05-215.18 | QAR1_23333448.10 (0.38)     | 3       | PHC3      | SLC, PHC3, PRKCI, PRKCS, GPR160                                                                                                                                                                                                                                                                                                                                                                                                                                                                                                                                                                                                                                                                                                                                                                                                                                                                                                                                                                                                                                                                                                                                                                                                                                                                                                                                                                                                                                                                                                                                                                                                                                                                                                                                                                                                                                                                                                                                                                                                                                                                                                                                                                                                                                                                                                                                                                                                                                                                                                                                                                                                                                                                                                                                                                                                                                                                                                                                                                                                                                                                                                                                                                                                                                                                                                                                                                                                                                                                                                                                                                                                                                                                                           |
| 4      | 2   | 134.30-135.45 | QAR2_14391600.1 (0.40)      | 4       | SP3       | CHRNA1, CHRNA1, PRP53, SCRN3, CIR1, SP3, OLA1, SP3                                                                                                                                                                                                                                                                                                                                                                                                                                                                                                                                                                                                                                                                                                                                                                                                                                                                                                                                                                                                                                                                                                                                                                                                                                                                                                                                                                                                                                                                                                                                                                                                                                                                                                                                                                                                                                                                                                                                                                                                                                                                                                                                                                                                                                                                                                                                                                                                                                                                                                                                                                                                                                                                                                                                                                                                                                                                                                                                                                                                                                                                                                                                                                                                                                                                                                                                                                                                                                                                                                                                                                                                                                                                        |
| 5      | 3   | 39.58-40.91   | QAR7_141 (0.60)             | 5       | WDR92     | SPRY1, ARF, FOXO4B, PRK, CNP1P1, CNP1P1, PNO1, WDR92, ETRAF1                                                                                                                                                                                                                                                                                                                                                                                                                                                                                                                                                                                                                                                                                                                                                                                                                                                                                                                                                                                                                                                                                                                                                                                                                                                                                                                                                                                                                                                                                                                                                                                                                                                                                                                                                                                                                                                                                                                                                                                                                                                                                                                                                                                                                                                                                                                                                                                                                                                                                                                                                                                                                                                                                                                                                                                                                                                                                                                                                                                                                                                                                                                                                                                                                                                                                                                                                                                                                                                                                                                                                                                                                                                              |
| 6      | 3   | 78.37-78.52   | Q65077 (0.37)               | 6       | –         | –                                                                                                                                                                                                                                                                                                                                                                                                                                                                                                                                                                                                                                                                                                                                                                                                                                                                                                                                                                                                                                                                                                                                                                                                                                                                                                                                                                                                                                                                                                                                                                                                                                                                                                                                                                                                                                                                                                                                                                                                                                                                                                                                                                                                                                                                                                                                                                                                                                                                                                                                                                                                                                                                                                                                                                                                                                                                                                                                                                                                                                                                                                                                                                                                                                                                                                                                                                                                                                                                                                                                                                                                                                                                                                                         |
| 7      | 3   | 133.32-93.98  | 645922 (0.49)               | 7       | DYF9      | DYF9, CYP26B1                                                                                                                                                                                                                                                                                                                                                                                                                                                                                                                                                                                                                                                                                                                                                                                                                                                                                                                                                                                                                                                                                                                                                                                                                                                                                                                                                                                                                                                                                                                                                                                                                                                                                                                                                                                                                                                                                                                                                                                                                                                                                                                                                                                                                                                                                                                                                                                                                                                                                                                                                                                                                                                                                                                                                                                                                                                                                                                                                                                                                                                                                                                                                                                                                                                                                                                                                                                                                                                                                                                                                                                                                                                                                                             |
| 8      | 4   | 154.16-154.26 | QAR3_16509294.1 (0.47)      | 8       | MSRB3     | MSRB3                                                                                                                                                                                                                                                                                                                                                                                                                                                                                                                                                                                                                                                                                                                                                                                                                                                                                                                                                                                                                                                                                                                                                                                                                                                                                                                                                                                                                                                                                                                                                                                                                                                                                                                                                                                                                                                                                                                                                                                                                                                                                                                                                                                                                                                                                                                                                                                                                                                                                                                                                                                                                                                                                                                                                                                                                                                                                                                                                                                                                                                                                                                                                                                                                                                                                                                                                                                                                                                                                                                                                                                                                                                                                                                     |
| 9      | 4   | 48.42-48.95   | QAR1_5148908.1 (0.46)       | 9       | BCAP29    | BCAP29, DCUSL1, BCAP29, SC2644, SC2643, DLD                                                                                                                                                                                                                                                                                                                                                                                                                                                                                                                                                                                                                                                                                                                                                                                                                                                                                                                                                                                                                                                                                                                                                                                                                                                                                                                                                                                                                                                                                                                                                                                                                                                                                                                                                                                                                                                                                                                                                                                                                                                                                                                                                                                                                                                                                                                                                                                                                                                                                                                                                                                                                                                                                                                                                                                                                                                                                                                                                                                                                                                                                                                                                                                                                                                                                                                                                                                                                                                                                                                                                                                                                                                                               |
| 10     | 4   | 68.36-69.21   | QAR4_7272094 (0.57)         | 10      | RPT81A    | TAK1BP1, DAN, HBAHB, NPST, VIL, H3A, H3A2, H3A3, H3A4, H3A5, H3A6, H3A7, H3A8, H3A9, H3A10, H3A11, H3A12, H3A13, H3A14, H3A15, H3A16, H3A17, H3A18, H3A19, H3A20, H3A21, H3A22, H3A23, H3A24, H3A25, H3A26, H3A27, H3A28, H3A29, H3A30, H3A31, H3A32, H3A33, H3A34, H3A35, H3A36, H3A37, H3A38, H3A39, H3A40, H3A41, H3A42, H3A43, H3A44, H3A45, H3A46, H3A47, H3A48, H3A49, H3A50, H3A51, H3A52, H3A53, H3A54, H3A55, H3A56, H3A57, H3A58, H3A59, H3A60, H3A61, H3A62, H3A63, H3A64, H3A65, H3A66, H3A67, H3A68, H3A69, H3A70, H3A71, H3A72, H3A73, H3A74, H3A75, H3A76, H3A77, H3A78, H3A79, H3A80, H3A81, H3A82, H3A83, H3A84, H3A85, H3A86, H3A87, H3A88, H3A89, H3A90, H3A91, H3A92, H3A93, H3A94, H3A95, H3A96, H3A97, H3A98, H3A99, H3A100, H3A101, H3A102, H3A103, H3A104, H3A105, H3A106, H3A107, H3A108, H3A109, H3A110, H3A111, H3A112, H3A113, H3A114, H3A115, H3A116, H3A117, H3A118, H3A119, H3A120, H3A121, H3A122, H3A123, H3A124, H3A125, H3A126, H3A127, H3A128, H3A129, H3A130, H3A131, H3A132, H3A133, H3A134, H3A135, H3A136, H3A137, H3A138, H3A139, H3A140, H3A141, H3A142, H3A143, H3A144, H3A145, H3A146, H3A147, H3A148, H3A149, H3A150, H3A151, H3A152, H3A153, H3A154, H3A155, H3A156, H3A157, H3A158, H3A159, H3A160, H3A161, H3A162, H3A163, H3A164, H3A165, H3A166, H3A167, H3A168, H3A169, H3A170, H3A171, H3A172, H3A173, H3A174, H3A175, H3A176, H3A177, H3A178, H3A179, H3A180, H3A181, H3A182, H3A183, H3A184, H3A185, H3A186, H3A187, H3A188, H3A189, H3A190, H3A191, H3A192, H3A193, H3A194, H3A195, H3A196, H3A197, H3A198, H3A199, H3A200, H3A201, H3A202, H3A203, H3A204, H3A205, H3A206, H3A207, H3A208, H3A209, H3A210, H3A211, H3A212, H3A213, H3A214, H3A215, H3A216, H3A217, H3A218, H3A219, H3A220, H3A221, H3A222, H3A223, H3A224, H3A225, H3A226, H3A227, H3A228, H3A229, H3A230, H3A231, H3A232, H3A233, H3A234, H3A235, H3A236, H3A237, H3A238, H3A239, H3A240, H3A241, H3A242, H3A243, H3A244, H3A245, H3A246, H3A247, H3A248, H3A249, H3A250, H3A251, H3A252, H3A253, H3A254, H3A255, H3A256, H3A257, H3A258, H3A259, H3A260, H3A261, H3A262, H3A263, H3A264, H3A265, H3A266, H3A267, H3A268, H3A269, H3A270, H3A271, H3A272, H3A273, H3A274, H3A275, H3A276, H3A277, H3A278, H3A279, H3A280, H3A281, H3A282, H3A283, H3A284, H3A285, H3A286, H3A287, H3A288, H3A289, H3A290, H3A291, H3A292, H3A293, H3A294, H3A295, H3A296, H3A297, H3A298, H3A299, H3A300, H3A301, H3A302, H3A303, H3A304, H3A305, H3A306, H3A307, H3A308, H3A309, H3A310, H3A311, H3A312, H3A313, H3A314, H3A315, H3A316, H3A317, H3A318, H3A319, H3A320, H3A321, H3A322, H3A323, H3A324, H3A325, H3A326, H3A327, H3A328, H3A329, H3A330, H3A331, H3A332, H3A333, H3A334, H3A335, H3A336, H3A337, H3A338, H3A339, H3A340, H3A341, H3A342, H3A343, H3A344, H3A345, H3A346, H3A347, H3A348, H3A349, H3A350, H3A351, H3A352, H3A353, H3A354, H3A355, H3A356, H3A357, H3A358, H3A359, H3A360, H3A361, H3A362, H3A363, H3A364, H3A365, H3A366, H3A367, H3A368, H3A369, H3A370, H3A371, H3A372, H3A373, H3A374, H3A375, H3A376, H3A377, H3A378, H3A379, H3A380, H3A381, H3A382, H3A383, H3A384, H3A385, H3A386, H3A387, H3A388, H3A389, H3A390, H3A391, H3A392, H3A393, H3A394, H3A395, H3A396, H3A397, H3A398, H3A399, H3A400, H3A401, H3A402, H3A403, H3A404, H3A405, H3A406, H3A407, H3A408, H3A409, H3A410, H3A411, H3A412, H3A413, H3A414, H3A415, H3A416, H3A417, H3A418, H3A419, H3A420, H3A421, H3A422, H3A423, H3A424, H3A425, H3A426, H3A427, H3A428, H3A429, H3A430, H3A431, H3A432, H3A433, H3A434, H3A435, H3A436, H3A437, H3A438, H3A439, H3A440, H3A441, H3A442, H3A443, H3A444, H3A445, H3A446, H3A447, H3A448, H3A449, H3A450, H3A451, H3A452, H3A453, H3A454, H3A455, H3A456, H3A457 |
